# Supplementary material for: A quinolin-8-ol sub-millimolar inhibitor of UGGT, the ER glycoprotein folding quality control checkpoint
Source: PubMed Central journal article supplement — iScience. 2023 Sep 20;26(10):107919. doi: 10.1016/j.isci.2023.107919 (PMC10562782; doi:10.1016/j.isci.2023.107919), 2023-09-20
Supplement: mmc1.pdf [file mmc1.pdf]

## **Supplemental information**

### **A quinolin-8-ol sub-millimolar inhibitor of UGGT, the ER glycoprotein folding quality control checkpoint**

**Kevin P. Guay, Roberta Ibba, J.L. Kiappes, Snežana Vasiljević, Francesco Boni, Maria De Benedictis, Ilaria Zeni, James D. Le Cornu, Mario Hensen, Anu V. Chandran, Anastassia L. Kantsadi, Alessandro T. Caputo, Juan I. Blanco Capurro, Yusupha Bayo, Johan C. Hill, Kieran Hudson, Andrea Lia, Juliane Brun, Stephen G. Withers, Marcelo Martí, Emiliano Biasini, Angelo Santino, Matteo De Rosa, Mario Milani, Carlos P. Modenutti, Daniel N. Hebert, Nicole Zitzmann, and Pietro Roversi**

## Supplementary Tables and Figures

Supplementary Table 1: **X-ray data collection parameters and data processing statistics for *CtUGGT*<sub>GT24</sub> crystal structures.** Related to STAR Methods.

| Structure                               | <i>CtUGGT</i> <sub>GT24</sub> | <sup>U2F</sup> <i>CtUGGT</i> <sub>GT24</sub> | <sup>5M-SOH-Q</sup> <i>CtUGGT</i> <sub>GT24</sub> |
|-----------------------------------------|-------------------------------|----------------------------------------------|---------------------------------------------------|
| PDB ID                                  | 7ZKC                          | 7ZLU                                         | 7ZLL                                              |
| Beamline                                | I03DLS                        | I04DLS                                       | I04DLS                                            |
| Wavelength $\lambda$ (mm, Å)            | 0.97960                       | 0.97956                                      | 0.97950                                           |
| Transmission %                          | 100                           | 100                                          | 100                                               |
| Number of images                        | 1,800                         | 1,800                                        | 3,600                                             |
| Oscillation range (°)                   | 0.1                           | 0.1                                          | 0.1                                               |
| Exposure time (s)                       | 0.02                          | 0.017                                        | 0.1                                               |
| Space Group (Z)                         | H3 (6)                        | P1 (3)                                       | H3 (6)                                            |
| Cell edges: a,b,c (Å)                   | a=b=118.82,c=62.12            | a=68.16,b=72.53, c=72.39                     | a=b=118.858, c=68.551                             |
| Cell angles $\alpha, \beta, \gamma$ (°) | $\alpha=\beta=90, \gamma=120$ | $\alpha=110.72, \beta=108.33, \gamma=108.27$ | $\alpha=\beta=90, \gamma=120$                     |
| Resolution Range (Å)                    | 59.41-1.77 (1.86-1.77)        | 41.16 - 2.05 (2.32-2.05)                     | 41.16-1.65 (1.74-1.65)                            |
| R <sub>merge</sub>                      | 0.14 (2.01)                   | 0.05 (0.42)                                  | 0.05 (1.60)                                       |
| R <sub>meas</sub>                       | 0.15 (2.25)                   | 0.08 (0.60)                                  | 0.05 (1.67)                                       |
| Observations                            | 322,614 (25,624)              | 68,743 (3,486)                               | 404,079 (21,046)                                  |
| Unique observations                     | 35,287 (5,115)                | 39,166 (1,958)                               | 38,495 (1,925)                                    |
| Average I/ $\sigma$ (I)                 | 7.8 (0.7)                     | 8.4 (1.6)                                    | 20.8 (1.3)                                        |
| Completeness %                          | 99.7 (99.2)                   | 81.1 (45.9)                                  | 88.4 (28.7)                                       |
| Multiplicity                            | 9.1 (5.0)                     | 1.8 (1.8)                                    | 10.5 (10.9)                                       |
| CC <sub>1/2</sub>                       | 0.99 (0.35)                   | 0.998 (0.646)                                | 1.000 (0.581)                                     |

Each structure was determined using a single crystal. Values in parentheses refer to the highest resolution shell.

Supplementary Table 2: **Refinement statistics for *CtUGGT*<sub>GT24</sub> crystal structures.** Related to STAR Methods.

| Structure                                             | <i>CtUGGT</i> <sub>GT24</sub> | <sup>U2F</sup> <i>CtUGGT</i> <sub>GT24</sub> | <sup>5M-SOH-Q</sup> <i>CtUGGT</i> <sub>GT24</sub> |
|-------------------------------------------------------|-------------------------------|----------------------------------------------|---------------------------------------------------|
| PDB ID                                                | 7ZKC                          | 7ZLU                                         | 7ZLL                                              |
| Ligand                                                | -                             | U2F                                          | 5M-SOH-Q                                          |
| Wavelength $\lambda$ (Å)                              | 0.97960                       | 0.97956                                      | 0.97950                                           |
| Space Group (Z)                                       | H3 (6)                        | P1 (3)                                       | H3 (6)                                            |
| Resolution Range (Å)                                  | 59.41-1.77 (1.86-1.77)        | 41.16 - 2.05 (2.32-2.05)                     | 59.27-2.53 (2.67-2.53)                            |
| R <sub>work</sub> , R <sub>free</sub>                 | 0.205, 0.226 (0.317, 0.331)   | 0.226, 0.270 (0.322, 0.445)                  | 0.209, 0.235 (0.310, 0.301)                       |
| Protein atoms (<B factor>, Å <sup>2</sup> )           | 2,432 (43.64)                 | 7,137 (36.44)                                | 2,448 (38.34)                                     |
| Water molecules (<B factor>, Å <sup>2</sup> )         | 227 (48.48)                   | 289 (34.65)                                  | 226 (48.00)                                       |
| Ligands (<B factor>, Å <sup>2</sup> )                 | Ca <sup>2+</sup> (30.34)      | 3 × (Ca <sup>2+</sup> , U2F) (42.62)         | Ca <sup>2+</sup> , 5M-SOH-Q (49.56)               |
| rmsd <sub>bonds</sub> (Å), rmsd <sub>angles</sub> (°) | 0.008, 0.90                   | 0.008, 0.94                                  | 0.008, 0.93                                       |
| Number of Ramachandran favoured (%)                   | 268 (100.0)                   | 824 (98.0)                                   | 287 (99.0)                                        |
| Number of Ramachandran allowed (%)                    | 1 (0.0)                       | 15 (2.0)                                     | 3 (1.0)                                           |
| Number of Ramachandran outliers (%)                   | 0 (0.0)                       | 0 (0.0)                                      | 0 (0.0)                                           |

Each structure was determined using a single crystal. All structures contain a Ca<sup>+</sup> ion coming from the protein solution. Values in parentheses refer to the highest resolution shell.

Supplementary Table 3: **Protein structures with 8-OH-quinoline ligands.** Related to Figures 1 and 2.

| PDB ID (Ref.)            | Protein             | Uniprot ID | 8-OH-Q ligand (PDB name)                                                | Binding site                                               |
|--------------------------|---------------------|------------|-------------------------------------------------------------------------|------------------------------------------------------------|
| 3KCY <sup>89</sup>       | HIF1AN              | Q9NWT6     | "                                                                       | Fe <sup>++</sup>                                           |
| 4BIO, 3OD4 <sup>65</sup> | "                   | "          | 8-hydroxyquinoline-5-carboxylic acid (8XQ)                              | Zn <sup>++</sup> or Fe <sup>++</sup>                       |
| 2XXZ                     | KDM6B               | O15054     | "                                                                       | "                                                          |
| 3NJY <sup>64</sup>       | KDM4A               | O75164     | "                                                                       | Ni <sup>++</sup> instead of physiological Fe <sup>++</sup> |
| 6FUK <sup>90</sup>       | UTX                 | O15550     | "                                                                       | "                                                          |
| 4IE4 <sup>66</sup>       | FTO                 | Q9C0B1     | "                                                                       | Fe <sup>++</sup>                                           |
| 4JHT <sup>65</sup>       | <i>E. coli</i> AlkB | P05050     | "                                                                       | Zn <sup>++</sup>                                           |
| 6RBJ                     | KDM3B               | H0Y946     | 5-(1 H-1,2,3,4-tetrazol-5-yl)quinolin-8-ol (JX8)                        | Mn <sup>++</sup>                                           |
| 6RBI                     | KDM5B               | Q9UGL1     | "                                                                       | Mn <sup>++</sup>                                           |
| 6AFR <sup>91</sup>       | BRD4                | O60885     | 5-[(4-fluoranylimidazol-1-yl)methyl]quinolin-8-ol (9E3)                 | quinolin-8-ol in hydrophobic pocket                        |
| 5Z5T <sup>92</sup>       | "                   | "          | 2-amino-4-(1H-imidazol-1-yl)quinolin-8-ol (96R)                         | "                                                          |
| 6LG7                     | "                   | "          | 2-azanyl-6-fluoranyl-4-imidazol-1-yl-quinolin-8-ol (ECF)                | H-bond and hydrophobic interactions                        |
| 6LG8                     | "                   | "          | 2-azanyl-5-fluoranyl-4-imidazol-1-yl-quinolin-8-ol (ECR)                | "                                                          |
| 6LG9                     | "                   | "          | 2-azanyl-7-bromanyl-4-imidazol-1-yl-quinolin-8-ol (ECU)                 | "                                                          |
| 4E26 <sup>93</sup>       | BRAF                | P15056     | 5-chloro-7-[(R)-furan-2-yl(pyridin-2-ylamino)methyl]quinolin-8-ol (734) | quinolin-8-ol sandwiched between Trp and Phe rings         |
| 5PA1                     | <i>RnComt</i>       | P15056     | 6-(4-fluorophenyl)quinolin-8-ol (7JS)                                   | Mg <sup>++</sup>                                           |
| 5PA7                     | "                   | "          | 6-(4-fluorophenyl)-8-oxidanyl-3 H-quinazolin-4-one (7JD)                | Mg <sup>++</sup>                                           |
| 6GY1 <sup>94</sup>       | "                   | "          | 7-fluoranyl-5-(4-methylphenyl)sulfonyl-quinolin-8-ol (FGQ)              | Mg <sup>++</sup>                                           |
| 3JSF <sup>95</sup>       | MIF                 | P14174     | 7-(2-fluorobenzyl)quinolin-8-ol (XV1)                                   | quinolin-8-ol sandwiched between Tyr and Phe rings         |
| 3JSG <sup>95</sup>       | "                   | "          | 7-(pyridin-3-ylmethyl)quinolin-8-ol (OIN)                               | "                                                          |
| 3JTU <sup>95</sup>       | "                   | "          | 7-(pyridin-2-ylmethyl)quinolin-8-ol (ZIN)                               | "                                                          |

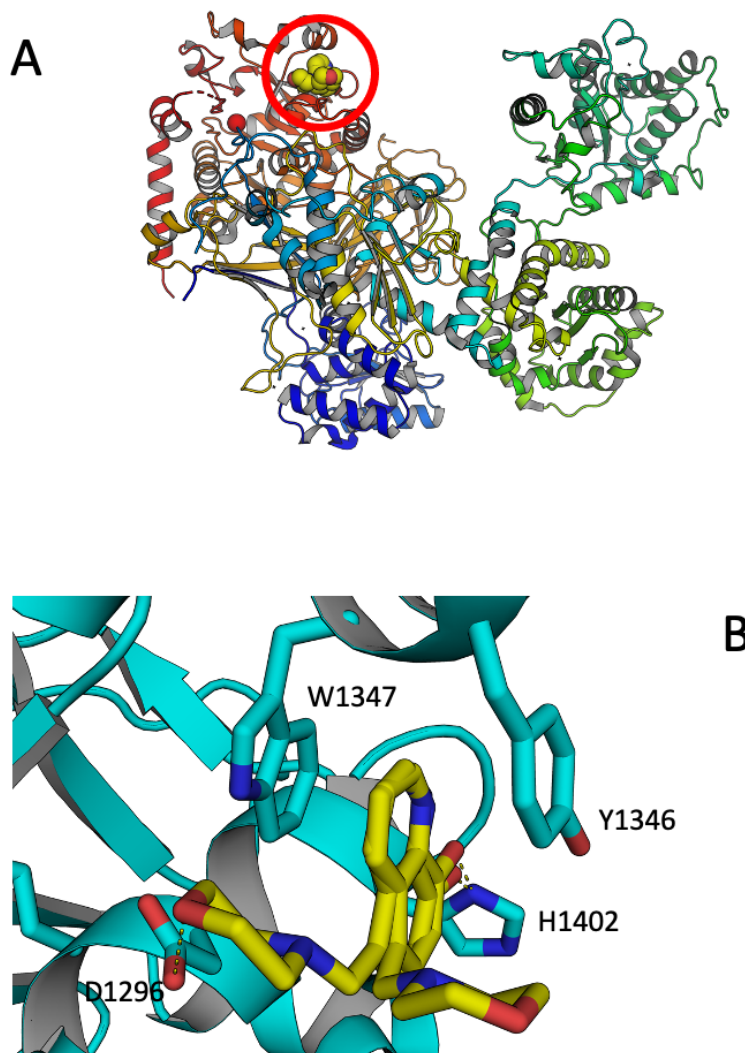

Supplementary Figure 1: **5M-8OH-Q binding site.** Related to Figure 1. **A:** the structure of  $^{5M-8OH-Q}CtUGGT_{GT24}$  (PDB ID 7ZLL) in complex with 5M-8OH-Q, superposed onto the structure of *CtUGGT* (PDB ID 5MZO) in order to illustrate the binding site of the inhibitor in the context of the whole structure. The protein is in cartoon representation coloured blue-to-red from N- to C-terminus; the 5M-8OH-Q is inside a red circle, in spheres representation (C atoms in yellow). **B:** Zoom onto the *CtUGGT*  $^{1346}YW^{1347}$  clamp (C atoms in green) binding 5M-8OH-Q (C atoms in cyan) Representative distances to interacting residues are in dashed lines. Only two of the many morpholine ring placements are shown. PDB ID: 7ZLL.

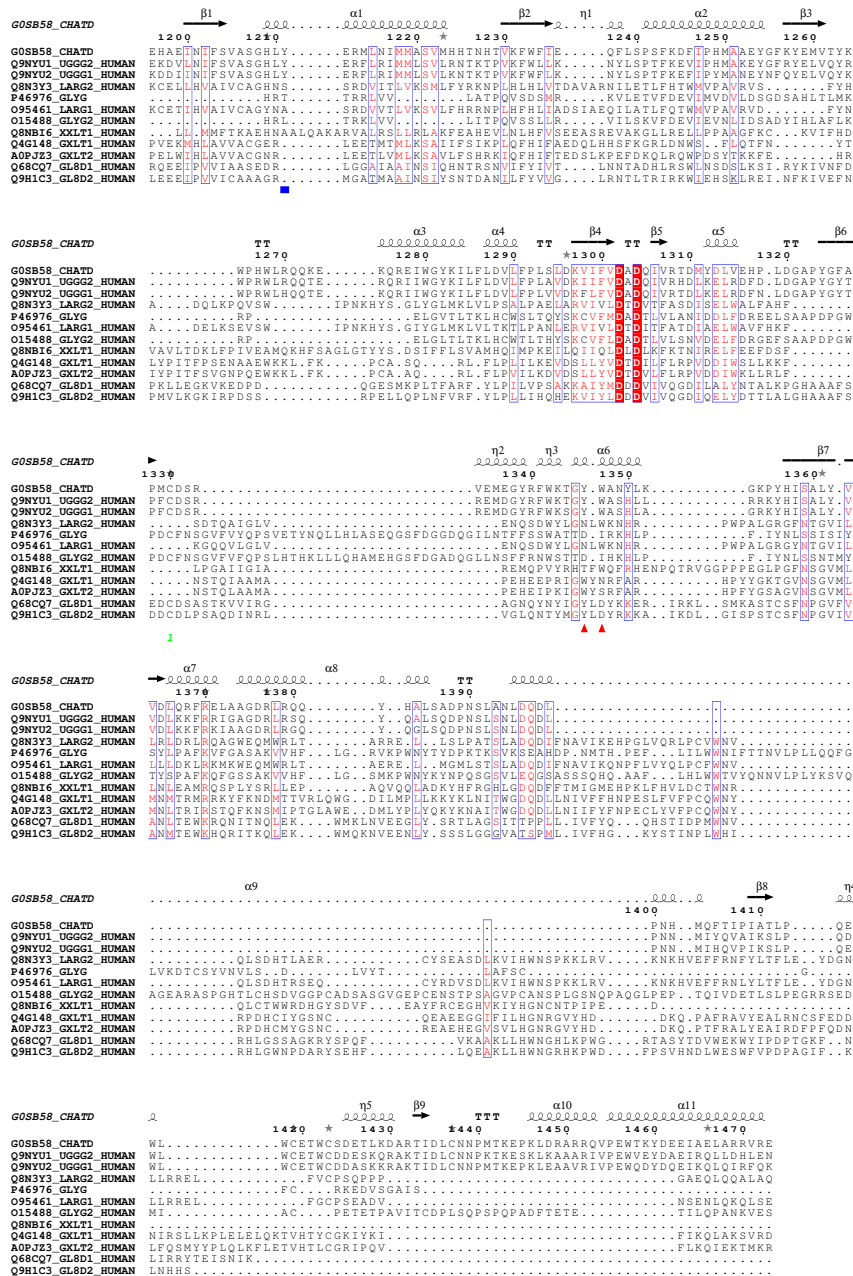

Supplementary Figure 2: Alignment of GT-24 and GT-8 domains in human proteins. Caption follows in the next page.

Supplementary Figure 2: **Alignment of GT-24 and GT-8 domains in human proteins.** Related to Figure 1. Caption of the figure in the previous page. The secondary structure illustrated is the one of *CtUGGT*<sub>GT24</sub>, Uniprot entry G0SB58\_CHATD, PDB IDs 5NV4 and 6FSN<sup>35,42</sup>. Uniprot codes and proteins: Q8N3Y3, Xylosyl- and glucuronyl-transferase LARGE2; P46976, Glycogenin 1; O95461, Xylosyl- and glucuronyl-transferase LARGE1; O15488, Glycogenin 2; Q8NBI6, Xyloside xylosyltransferase 1; Q4G148, Glucoside xylosyltransferase 1; A0PJZ3, Glucoside xylosyltransferase 2; Q68CQ7, Glycosyltransferase 8 domain-containing protein 1; Q9H1C3, Glycosyltransferase 8 domain-containing protein 2. The *CtUGGT* D1302 and D1304 residues coordinating Ca<sup>2+</sup> ion are completely conserved across these sequences. Red triangles mark the *CtUGGT*<sup>1346</sup>WY<sup>1347</sup> clamp. A blue square marks the position of *CtUGGT* Y1211 (coordinating the U2F uracyl ring). A blue oval marks the position of *CtUGGT* D1435 (coordinating the Ca<sup>2+</sup> ion).

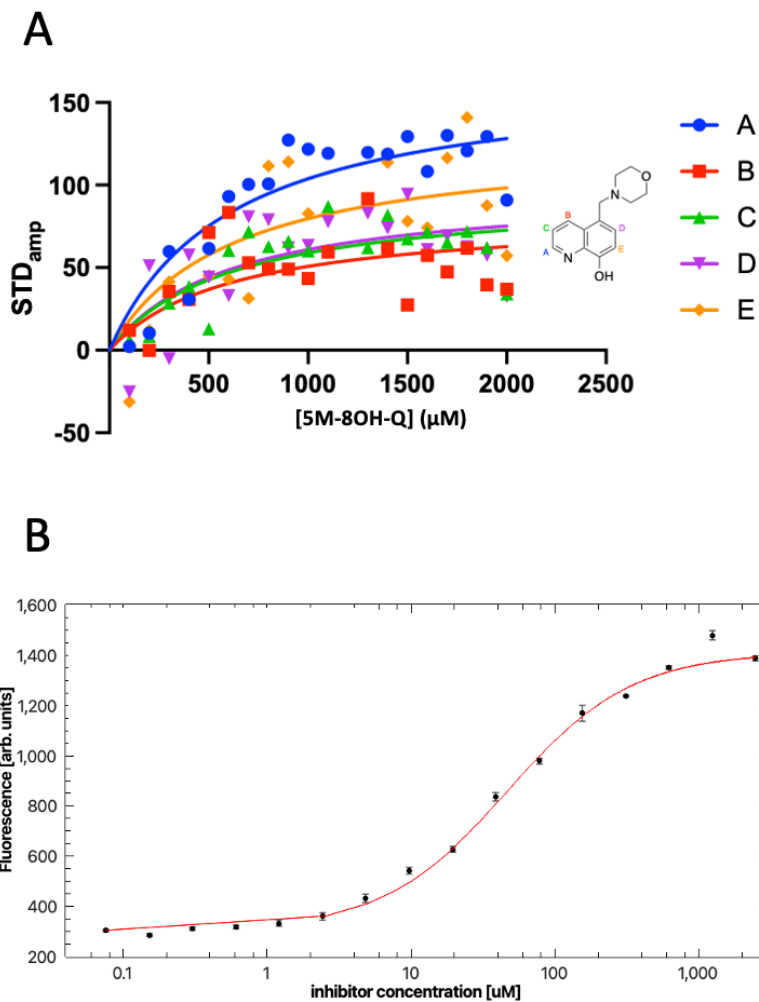

Supplementary Figure 3: **5M-8OH-Q binds UGGT *in vitro***. Related to Figure 4. **A**: Measurement of the  $K_d$  dissociation constant of the complex between 5M-8OH-Q and human UGGT1 by STD NMR *in vitro*. Each curve follows the interaction of one of the H atoms of 5M-8OH-Q with the human UGGT1 protein. No measurements were possible below  $[5M-8OH-Q]=100 \mu M$ , so it is possible that the weak binding observed relates to a second weaker accessory site once saturation of the main one (see panel **B**) has taken place. **B**: Binding of 5M-8OH-Q to NT-RED-NHS-labelled *Ct*UGGT<sub>GT24</sub> as measured by LEF.  $\lambda_{Excit}=650 \text{ nm}$ .  $\lambda_{Emiss}=670 \text{ nm}$ . NT-RED-NHS-labelled *Ct*UGGT<sub>GT24</sub> 100 nM; 5M-8OH-Q dilution series from 2.5 mM to 76.3 nM. Three independent dilution series.



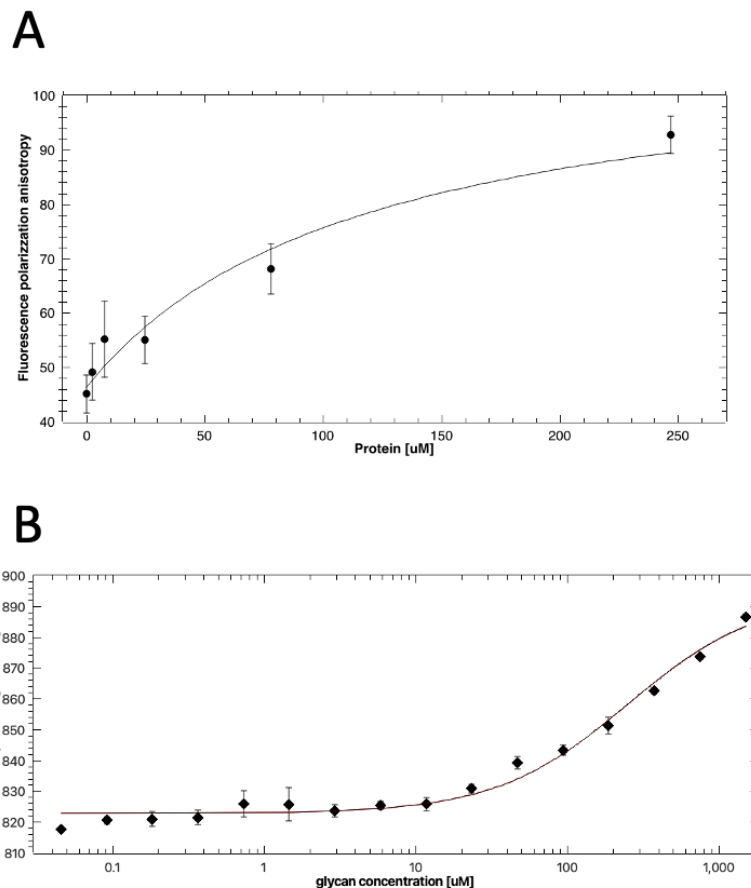

Supplementary Figure 4: **Affinity of the *Ct* UGGT<sub>GT24</sub> domain for *N*-linked glycans.** Related to Figure 4. **A:** Changes in fluorescence polarization anisotropy of 2AA-labelled GlcNAc<sub>2</sub>Man<sub>9</sub> (2AA-M9) glycan binding to the *Ct*UGGT<sub>GT24</sub> domain: four independent dilution series of *Ct*UGGT<sub>GT24</sub> domain from 247 to 0  $\mu\text{M}$  were mixed with 200 nM 2AA-M9 glycan and the anisotropy of fluorescence polarization measured ( $\lambda_{\text{excit}}=360$  nm,  $\lambda_{\text{emiss}}=490$  nm). Fitting the curve with an equilibrium constant a value of  $K_D=(117 \pm 32)$   $\mu\text{M}$  is obtained. **B:** Binding of 2AA-M5-9 mixture to NT-RED-NHS-labelled *Ct*UGGT<sub>GT24</sub> as measured by MST.  $\lambda_{\text{Excit}}=650$  nm.  $\lambda_{\text{Emiss}}=670$  nm. NT-RED-NHS-labelled *Ct*UGGT<sub>GT24</sub> 100 nM; 2AA-M5-9 dilution series from 1.5 mM to 45.8 nM. Three independent dilution series. Fitting the curve with an equilibrium constant, a value of an average  $K_D=(250 \pm 39)$   $\mu\text{M}$  is obtained.

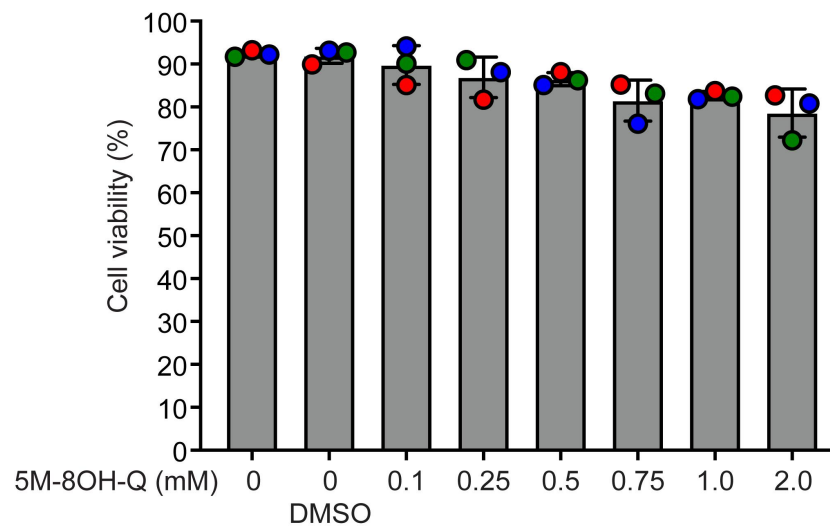

Supplementary Figure 5: **Viability of *ALG6*<sup>-/-</sup> HEK293-6E cells after 5 hr 5M-8OH-Q treatment.** Related to Figures 5 and 6. Prior to lysis, cells were dissociated and washed twice with PBS before being resuspending in 1 mL of PBS. Resuspended cells were diluted 1:1 with trypan blue and counted using a LUNA II<sup>TM</sup> Automated Cell Counter. Error bars represent the standard deviation of three independent biological replicates.
